# Supplementary material for: Perioperative Transfusion and Mortality for Cardiovascular Surgery: A Cohort Study Based on Population in Republic of Korea
Source: MDPI journal article supplement (doi:10.3390/jcm13082328), 2024-04-17
Supplement: s1 [file s1]

Table S3. All ORs with 95% CIs of other covariates in multivariable model 1

| Variable                      | OR (95% CI)       | <i>P</i> -value |
|-------------------------------|-------------------|-----------------|
| Age, year                     | 1.04 (1.04, 1.05) | <0.001          |
| Sex, male                     | 0.98 (0.89, 1.08) | 0.726           |
| Having a job                  | 0.97 (0.86, 1.08) | 0.530           |
| Household income level        |                   |                 |
| Q1 (Lowest)                   | 1                 |                 |
| Q2                            | 1.05 (0.88, 1.26) | 0.567           |
| Q3                            | 0.99 (0.84, 1.17) | 0.872           |
| Q4 (Highest)                  | 0.96 (0.83, 1.12) | 0.623           |
| Medical aid program group     | 1.37 (1.09, 1.70) | 0.006           |
| Unknown                       | 1.01 (0.69, 1.49) | 0.949           |
| Residence                     |                   |                 |
| Urban area                    | 1                 |                 |
| Rural area                    | 0.87 (0.78, 0.96) | 0.006           |
| Unknown                       | 0.63 (0.42, 0.94) | 0.024           |
| CCI, point                    | 1.04 (1.01, 1.07) | 0.008           |
| Hospital admission through ER | 2.07 (1.88, 2.28) | <0.001          |
| Type of hospital              |                   |                 |
| Tertiary general hospital     | 1                 |                 |
| General hospital              | 1.40 (1.25, 1.56) | <0.001          |
| Type of surgery               |                   |                 |
| CABG only                     | 1                 |                 |
| Valve only                    | 1.31 (1.10, 1.56) | 0.002           |
| CABG + valve                  | 1.47 (1.16, 1.87) | 0.002           |
| Aortic procedures             | 2.77 (2.33, 3.28) | <0.001          |

|                               |                      |        |
|-------------------------------|----------------------|--------|
| Others                        | 0.86 (0.68, 1.08)    | 0.198  |
| CPB use during surgery        | 1.09 (0.93, 1.28)    | 0.287  |
| Redo case                     | 1.45 (1.16, 1.88)    | <0.001 |
| Mechanical ventilator support | 0.88 (0.67, 1.15)    | 0.343  |
| ECMO support                  | 23.08 (20.58, 25.89) | <0.001 |
| CRRT use                      | 7.99 (7.16, 8.93)    | <0.001 |
| Year of admission             |                      |        |
| 2010                          | 1                    |        |
| 2011                          | 1.04 (0.82, 1.31)    | 0.772  |
| 2012                          | 0.88 (0.70, 1.12)    | 0.299  |
| 2013                          | 0.67 (0.53, 0.86)    | 0.001  |
| 2014                          | 0.77 (0.61, 0.98)    | 0.032  |
| 2015                          | 0.73 (0.58, 0.92)    | 0.008  |
| 2016                          | 0.61 (0.48, 0.77)    | <0.001 |
| 2017                          | 0.48 (0.38, 0.60)    | <0.001 |
| 2018                          | 0.47 (0.38, 0.58)    | <0.001 |
| 2019                          | 0.47 (0.38, 0.58)    | <0.001 |

---

OR, odds ratio; CI, confidence interval; CCI, Charlson comorbidity index; ER, emergency room; CABG, coronary artery bypass grafting; CPB, cardiopulmonary bypass; ECMO, extracorporeal membrane oxygenation; CRRT, continuous renal replacement therapy; pRBC, packed red blood cell; FFP, fresh frozen plasma.
