# Supplementary material for: Perioperative Transfusion and Mortality for Cardiovascular Surgery: A Cohort Study Based on Population in Republic of Korea
Source: MDPI journal article supplement (doi:10.3390/jcm13082328), 2024-04-17
Supplement: s1 [file s1]

Table S4. All HRs with 95% CIs of other covariates in multivariable model 3

| Variable                      | HR (95% CI)       | <i>P</i> -value |
|-------------------------------|-------------------|-----------------|
| Age, year                     | 1.04 (1.04, 1.05) | <0.001          |
| Sex, male                     | 1.07 (1.02, 1.13) | 0.008           |
| Having a job                  | 0.97 (0.92, 1.03) | 0.383           |
| Household income level        |                   |                 |
| Q1 (Lowest)                   | 1                 |                 |
| Q2                            | 0.95 (0.87, 1.05) | 0.349           |
| Q3                            | 0.88 (0.81, 0.97) | 0.007           |
| Q4 (Highest)                  | 0.90 (0.82, 0.97) | 0.008           |
| Medical aid program group     | 1.24 (1.10, 1.39) | <0.001          |
| Unknown                       | 0.89 (0.72, 1.10) | 0.270           |
| Residence                     |                   |                 |
| Urban area                    | 1                 |                 |
| Rural area                    | 0.96 (0.91, 1.01) | 0.136           |
| Unknown                       | 1.51 (1.22, 1.87) | <0.001          |
| CCI, point                    | 1.09 (1.08, 1.11) | <0.001          |
| Hospital admission through ER | 1.64 (1.56, 1.73) | <0.001          |
| Type of hospital              |                   |                 |
| Tertiary general hospital     | 1                 |                 |
| General hospital              | 1.17 (1.10, 1.24) | <0.001          |
| Type of surgery               |                   |                 |
| CABG only                     | 1                 |                 |
| Valve only                    | 1.30 (1.19, 1.42) | <0.001          |
| CABG + valve                  | 1.30 (1.14, 1.47) | <0.001          |
| Aortic procedures             | 1.96 (1.79, 2.15) | <0.001          |

|                               |                   |        |
|-------------------------------|-------------------|--------|
| Others                        | 1.19 (1.06, 1.33) | 0.003  |
| CPB use during surgery        | 0.91 (0.83, 0.99) | 0.028  |
| Redo case                     | 0.86 (0.73, 1.02) | 0.082  |
| Mechanical ventilator support | 1.07 (0.92, 1.24) | 0.383  |
| ECMO support                  | 6.70 (6.27, 7.15) | <0.001 |
| CRRT use                      | 4.33 (4.07, 4.61) | <0.001 |
| Year of admission             |                   |        |
| 2010                          | 1                 |        |
| 2011                          | 1.12 (0.98, 1.28) | 0.110  |
| 2012                          | 1.07 (0.93, 1.23) | 0.338  |
| 2013                          | 0.93 (0.81, 1.07) | 0.291  |
| 2014                          | 1.05 (0.92, 1.20) | 0.489  |
| 2015                          | 0.96 (0.84, 1.10) | 0.554  |
| 2016                          | 0.80 (0.70, 0.91) | <0.001 |
| 2017                          | 0.78 (0.69, 0.88) | <0.001 |
| 2018                          | 0.75 (0.67, 0.85) | <0.001 |
| 2019                          | 0.75 (0.67, 0.85) | <0.001 |

---

HR, hazard ratio; CI, confidence interval; CCI, Charlson comorbidity index; ER, emergency room; CABG, coronary artery bypass grafting; CPB, cardiopulmonary bypass; ECMO, extracorporeal membrane oxygenation; CRRT, continuous renal replacement therapy; pRBC, packed red blood cell; FFP, fresh frozen plasma.
