# Supplementary material for: Perioperative Transfusion and Mortality for Cardiovascular Surgery: A Cohort Study Based on Population in Republic of Korea
Source: MDPI journal article supplement (doi:10.3390/jcm13082328), 2024-04-17
Supplement: s1 [file s1]

Table S1. Names of the cardiovascular surgeries and procedural codes used for data extraction

|       |                                                                                                         |
|-------|---------------------------------------------------------------------------------------------------------|
| O1793 | Valve Replacement-Aortic Valve                                                                          |
| O1782 | Valvuloplasty-Mitral Valve                                                                              |
| O1792 | Valve Replacement-Mitral Valve                                                                          |
| O2031 | Resection of Aneurysm-Ascending Aorta                                                                   |
| O1781 | Valvuloplasty-Tricuspid Valve                                                                           |
| OA641 | Vascular Bypass Operation (Aorta-Coronary), Simple                                                      |
| OA649 | Vascular Bypass Operation (Aorta-Coronary)-Simple (Off Pump CABG)                                       |
| OA648 | Vascular Bypass Operation (Aorta-Coronary)-Simple (Off Pump CABG)                                       |
| O1981 | Resection of Atrial Myxoma                                                                              |
| O2034 | Resection of Aneurysm-Abdominal Aorta and Iliac Artery                                                  |
| O2032 | Resection of Aneurysm-Aortic Arch                                                                       |
| O1648 | Vascular Bypass Operation (Aorta-Coronary)-Simple                                                       |
| O2033 | Resection of Aneurysm-Descending Thoracic Aorta                                                         |
| O1795 | Reoperation of Valvuloplasty-Mitral Valve                                                               |
| O1641 | Vascular Bypass Operation (Aorta-Coronary), Simple                                                      |
| OA640 | Vascular Bypass Operation (Aorta-Coronary)-Simple (Off Pump CABG)                                       |
| O1640 | Vascular Bypass Operation (Aorta-Coronary)-Simple                                                       |
| O1644 | Vascular Bypass Op (Aorta-Renal, Thoracic, Abdominal Aorta-Femoral, Aorta-Splanchnic),Artificial Vessel |
| O1796 | Reoperation of Valvuloplasty-Aortic Valve                                                               |
| Q8080 | Heart Transplantation                                                                                   |
| O1799 | Sutureless Aortic Valve Replacement                                                                     |
| O1649 | Vascular Bypass Operation (Aorta-Coronary)-Simple                                                       |
| O0224 | Resection of Aneurysm-Abdominal Aorta (Infrarenal)                                                      |
| O1982 | Resection of Cardiac Tumor-Others                                                                       |
| O1797 | Valve Replacement-Pulmonary Valve                                                                       |
| O1783 | Valvuloplasty-Aortic Valve                                                                              |

|       |                                                                                                        |
|-------|--------------------------------------------------------------------------------------------------------|
| O1791 | Valve Replacement-Tricuspid Valve                                                                      |
| O1798 | Reoperation of Valvuloplasty-Pulmonary Valve                                                           |
| O1794 | Reoperation of Valvuloplasty-Tricuspid Valve                                                           |
| O1647 | Vascular Bypass Operation (Aorta-Coronary), Complex                                                    |
| OA647 | Vascular Bypass Operation (Aorta-Coronary), Complex                                                    |
| O0223 | Resection of Aneurysm-Abdominal Aorta (Suprarenal [Juxtarenal])                                        |
| O1830 | Coronary Endarterectomy                                                                                |
| OB638 | Angioplasty (With Patch Graft)-Others, Artificial Vessel                                               |
| OB634 | Angioplasty (With Patch Graft)-By Thoracotomy, Artificial Vessel                                       |
| O1680 | Correction of Coarctation of Aorta                                                                     |
| O1643 | Vascular Bypass Op (Aorta-Renal, Thoracic, Abdominal Aorta-Femoral,Aorta-Splanchnic),Autologous Vessel |
| O1740 | Operation of Aortic Stenosis                                                                           |
| OB633 | Angioplasty (End-to-End Anastomosis)-Others                                                            |
| OB639 | Angioplasty (With Patch Graft)-Others, Autologous Vessel                                               |
| OB631 | Angioplasty (End-to-End Anastomosis)-By Thoracotomy                                                    |
| O0174 | Vascular Bypass Operation (Aorta-innominate, carotid and subclavian arteries)                          |
| OB632 | Angioplasty (End-to-End Anastomosis)-By Laparotomy                                                     |
| O0173 | Vascular Bypass Operation (Aorto to carotid and subclavian artery)                                     |
| O1852 | Repair of Complicated Congenital Heart Diseases-Others                                                 |
| OB636 | Angioplasty (With Patch Graft)-By Laparotomy, Artificial Vessel                                        |
| Q8103 | Lung Transplantation-Heart and Lung                                                                    |
| OB635 | Angioplasty (With Patch Graft)-By Thoracotomy, Autologous Vessel                                       |
| OB637 | Angioplasty (With Patch Graft)-By Laparotomy, Autologous Vessel                                        |
| O1851 | Repair of Complicated Congenital Heart Diseases-Highly Complicated                                     |
| O1960 | Closure of Aorto-Pulmonary Window                                                                      |
