# Supplementary material for: Perioperative Transfusion and Mortality for Cardiovascular Surgery: A Cohort Study Based on Population in Republic of Korea
Source: J Clin Med. 2024 Apr 17;13(8):2328. doi: 10.3390/jcm13082328 (PMC11051365; doi:10.3390/jcm13082328)
Supplement: Supplementary file 1 [file jcm-13-02328-s001.zip]

Archive with 4 entries (4 files):
- Table S4.pdf
- TableS1.pdf
- TableS2.pdf
- Table S3.pdf
